# Supplementary material for: Pulmonary Co-Infections Detected Premortem Underestimate Postmortem Findings in a COVID-19 Autopsy Case Series
Source: MDPI journal article supplement (doi:10.3390/pathogens12070932), 2023-07-12
Supplement: s1 [file s1]

## Supplementary Material

| Patient # | Patient Name | Hospital | Sex | DOB | Age at Death | Race | Ethnicity | BMI | Symptom Onset |
|-----------|--------------|----------|-----|-----|--------------|------|-----------|-----|---------------|
|           |              |          |     |     |              |      |           |     |               |

| Hospital Admission | Did this patient undergo multiple hospitalizations? | Are outside hospital records available on this patient, either within the hospital system or CRIS via EMR? | Date of Death | Time of Death | Date of Autopsy | Time of Autopsy | Medical History |
|--------------------|-----------------------------------------------------|------------------------------------------------------------------------------------------------------------|---------------|---------------|-----------------|-----------------|-----------------|
|                    |                                                     |                                                                                                            |               |               |                 |                 |                 |

| Surgical History | Enter all documented Home Medications | List any vasopressive medications received | List any antibiotics received | List any systemic steroids received | List any prophylactic anticoagulation | List any system anticoagulation received | List any paralytics received |
|------------------|---------------------------------------|--------------------------------------------|-------------------------------|-------------------------------------|---------------------------------------|------------------------------------------|------------------------------|
|                  |                                       |                                            |                               |                                     |                                       |                                          |                              |

| List any inhaled vasodilators received | List COVID-specific treatments received | Was this patient placed on ECMO? | List any form of Renal Replacement Therapy patient received | Was this Patient Intubated? | Did this patient undergo tracheostomy? | If patient was not intubated, list all forms of respiratory care patient received | Did patient have chest tube(s) placed? |
|----------------------------------------|-----------------------------------------|----------------------------------|-------------------------------------------------------------|-----------------------------|----------------------------------------|-----------------------------------------------------------------------------------|----------------------------------------|
|                                        |                                         |                                  |                                                             |                             |                                        |                                                                                   |                                        |

**Supplementary Figure S1: Chart review form used to collect demographic and treatment data.**

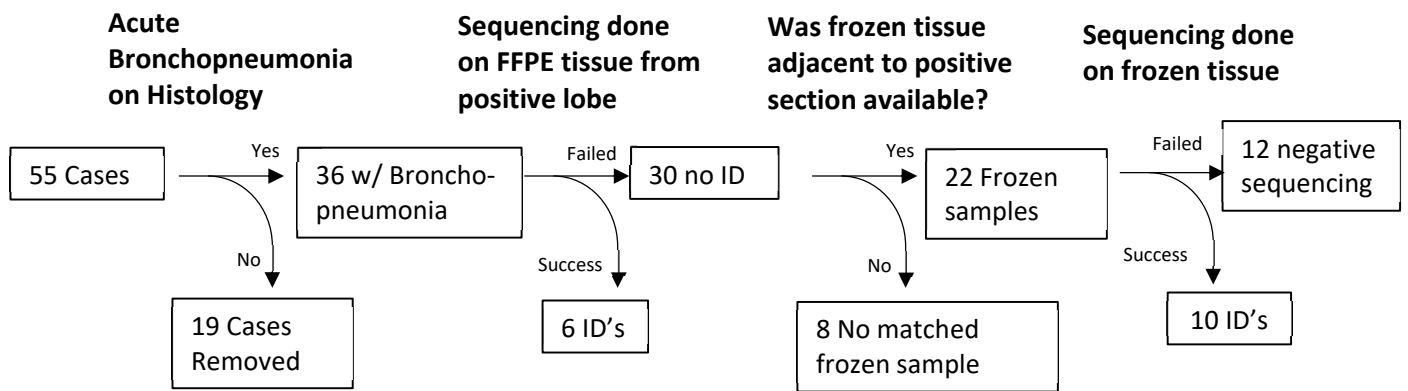

**Supplementary Figure S2: Flow diagram illustrating sample selection criteria and results of 16S bacterial PCR and sequencing on lung tissue.**

**Supplementary Table S1: Characteristics of autopsy cases separated by site of autopsy. P values are univariate analyses between sites.**

|                                   | NIH (n=44)         | UW (n=11)          | p value |
|-----------------------------------|--------------------|--------------------|---------|
| Median age in years (IQR)         | 62.5 (47.25,71)    | 63 (53,72)         | 0.8659  |
| Female, %                         | 31.80%             | 36.40%             | 0.9999  |
| Race, %                           |                    |                    | 0.0968  |
| White                             | 43.20%             | 54.50%             |         |
| Black or African American         | 40.90%             | 9.10%              |         |
| Hispanic Ethnicity, %             | 15.90%             | 36.40%             | 0.9999  |
| Median BMI (IQR)                  | 30.95 (25,36.9025) | 32.75 (27.3,38.15) | 0.6199  |
| Comorbidities                     |                    |                    |         |
| COVID-related (IQR)               | 2 (1,3)            | 3 (2,4)            | 0.0867  |
| Days from onset to death (IQR)    | 21 (12,37.5)       | 18 (16,22.5)       | 0.4442  |
| Hospital duration, days (IQR)     | 13 (6,30.25)       | 13 (6.5,20.5)      | 0.7281  |
| ICU duration, days (IQR)          | 11 (4,26.5)        | 13 (6,18)          | 0.9865  |
| Intubated, %                      | 79.50%             | 100.00%            | 0.1787  |
| Intubation duration, days (IQR)   | 11 (3,28)          | 12 (2,18)          | 0.5642  |
| Post-Mortem Interval, hours (IQR) | 22.2 (18.2,33.9)   | 72 (36,84)         | <0.0001 |
| Presence of Bronchopneumonia, (%) | 65.10%             | 63.60%             | 0.9999  |

### Supplementary Table S2: Premortem and postmortem pulmonary co-infection results.

Cases where premortem culture results align with postmortem sequencing are in red. To define semi-quantitative abundance in NGS sequencing three synthetic control DNA templates were spiked into reactions at defined copy numbers (2000, 200, and 20), with "major abundance" indicating organism-specific reads exceeding the most abundant synthetic template; "minor abundance" indicating those below the least abundant synthetic template, and "moderate abundance" falling between those levels.

| Patient ID | Premortem pulmonary co-infection diagnosed | Premortem respiratory pathogens cultured | Antibiotics received                                                                                                   | Postmortem bronchopeum noia present | B&H stain positive | GMS stain positive | Sequencing Results                                                                                                                                                                                                                                                                                                                                                                                                                                                      |
|------------|--------------------------------------------|------------------------------------------|------------------------------------------------------------------------------------------------------------------------|-------------------------------------|--------------------|--------------------|-------------------------------------------------------------------------------------------------------------------------------------------------------------------------------------------------------------------------------------------------------------------------------------------------------------------------------------------------------------------------------------------------------------------------------------------------------------------------|
| P1         |                                            |                                          | Linezolid, piperacillin-tazobactam, ceftriaxone, vancomycin, clindamycin                                               | Yes                                 | Yes                | Yes                | [Major abundance]: Prevotella melaninogenica<br><br>[Moderate abundance]: Mycoplasma salivarium, Fusobacterium nucleatum<br><br>[Minor abundance]: Prevotella oulorum, Limosilactobacillus (Lactobacillus) fermentum                                                                                                                                                                                                                                                    |
| P2         |                                            |                                          | vancomycin, cefepime                                                                                                   |                                     |                    |                    | [Major abundance]: Pseudomonas aeruginosa<br><br>[Moderate abundance]: Enterococcus faecalis                                                                                                                                                                                                                                                                                                                                                                            |
| P3         |                                            |                                          |                                                                                                                        |                                     |                    |                    | [Major abundance]: Pseudomonas aeruginosa<br><br>[Moderate abundance]: Bacteria of the Family Enterobacteriaceae                                                                                                                                                                                                                                                                                                                                                        |
| P4         |                                            |                                          | vancomycin                                                                                                             |                                     | Yes                |                    | [Moderate abundance]: Corynebacterium striatum, Staphylococcus aureus, Streptococcus salivarius group, Rothia mucilaginosa<br><br>[Minor abundance]: Streptococcus parasanguinis, Corynebacterium propinquum, Veillonella parvula, Veillonella species, Granulicatella adiacens, Streptococcus mitis group (not Streptococcus pneumoniae), Streptococcus gordonii, Staphylococcus epidermidis, Streptococcus mutans, Actinomyces gerencseriae, Corynebacterium accolens |
| P5         | Yes                                        | K. pneumoniae, S. marcescens             | Ceftriaxone, doxycycline, linezolid, piperacillin-tazobactam, vancomycin, amikacin, meropenem, polymyxin B, micafungin | Yes                                 |                    | Yes                | [Major abundance]: Staphylococcus aureus<br><br>[Minor abundance]: Pseudomonas putida group                                                                                                                                                                                                                                                                                                                                                                             |
| P6         |                                            |                                          | Piperacillin-tazobactam, vancomycin                                                                                    | Yes                                 |                    |                    | Minor abundance]: Mycoplasma salivarium, Fusobacterium nucleatum                                                                                                                                                                                                                                                                                                                                                                                                        |
| P7         |                                            |                                          | amikacin, cefepime, meropenem, micafungin, vancomycin                                                                  | Yes                                 | Yes                |                    | [Major abundance]: Lactobacillus gasseri<br><br>[Moderate abundance]: Prevotella oris, Prevotella scapos<br><br>[Minor abundance]: Prevotella jejunii, Streptococcus anginosus                                                                                                                                                                                                                                                                                          |

|     |     |                                          |                                                                                                                                                            |     |     |                                                                                                                                                                                                                                                                                                 |
|-----|-----|------------------------------------------|------------------------------------------------------------------------------------------------------------------------------------------------------------|-----|-----|-------------------------------------------------------------------------------------------------------------------------------------------------------------------------------------------------------------------------------------------------------------------------------------------------|
| P8  | Yes | MSSA, <b>A. baumannii</b>                | amoxicillin, ampicillin-sulbactam, cefazolin, cefepime, ceftriazone, linezolid, meropenem, minocycline, polymixin B                                        | Yes | Yes | [Minor abundance]: Streptococcus pneumoniae, Neisseria subflava, Porphyromonas pasteri, Fusobacterium periodonticum or Fusobacterium pseudoperiodonticum, Porphyromonas species, Gemella sanguinis, Phocaeicola (Bacteroides) dorei, Haemophilus parainfluenzae, Streptococcus salivarius group |
| P9  | Yes | K. aerogenes, <b>P. aeruginosa</b>       | Azithromycin, amikacin, ampicillin, cefazolin, cefapime, fluconazole                                                                                       | Yes | Yes | [Moderate abundance]: Prevotella oris<br><br>[Minor abundance]: Prevotella jejuni, Veillonella species, Veillonella atypica, Prevotella melaninogenica, Staphylococcus aureus, Lactobacillus gasseri                                                                                            |
| P10 |     |                                          |                                                                                                                                                            | Yes | Yes | [Moderate abundance]: Bacteria of the Order Bacteroidales, Bacteria of the Phylum Bacteroidetes<br><br>[Minor abundance]: Prevotella melaninogenica, Prevotella nanceiensis                                                                                                                     |
| P11 | Yes | <b>P. aeruginosa, E. coli</b>            | none<br>amikacin, cefepime, daptomycin, meropenem, metronidazole, vancomycin, linezolid, azithromycin, ceftriaxone                                         | Yes | Yes |                                                                                                                                                                                                                                                                                                 |
| P12 | Yes | A. baumannii, MRSA, K. pneumoniae        | ampicillin-sulbactam, ceftriaxone, meropenem, minocycline, polymyxin B, linezolid, piperacillin-tazobactam, cefepime, levofloxacin, micafungin, vancomycin | Yes |     |                                                                                                                                                                                                                                                                                                 |
| P13 | Yes | K. pneumoniae, P. aeruginosa, K. oxytoca | ceftolozane-tazobactam, linezolid, cefepime, amikacin, ampicillin, meropenem, ceftriaxone                                                                  | Yes |     |                                                                                                                                                                                                                                                                                                 |
| P14 |     |                                          | piperacillin/tazobactam, vancomycin, doxycycline                                                                                                           | Yes | Yes |                                                                                                                                                                                                                                                                                                 |
| P15 |     |                                          | levofloxacin, imipenem/cilastatin, ceftriaxone                                                                                                             | Yes | Yes | Yes                                                                                                                                                                                                                                                                                             |
| P16 |     |                                          | vancomycin, piperacillin-tazobactam                                                                                                                        |     | Yes |                                                                                                                                                                                                                                                                                                 |
| P17 | Yes | <b>MRSA, MSSA</b>                        | vancomycin, ceftaroline, daptomycin, piperacillin-tazobactam, micafungin                                                                                   | Yes | Yes |                                                                                                                                                                                                                                                                                                 |

|     |     |                           |                                                                                                                                                                                                                    |     |     |
|-----|-----|---------------------------|--------------------------------------------------------------------------------------------------------------------------------------------------------------------------------------------------------------------|-----|-----|
| P18 |     |                           | aztreonam,<br>vancomycin                                                                                                                                                                                           | Yes | Yes |
| P19 |     |                           | levofloxacin,<br>vancomycin                                                                                                                                                                                        | Yes |     |
| P20 | Yes | E. coli, P.<br>aeruginosa | cefepime,<br>ertapenem,<br>meropenem,<br>amikacin,<br>ceftolozane-<br>tazobactam,<br>linezolid,<br>fluconazole,<br>vancomycin                                                                                      | Yes |     |
| P21 |     |                           | vancomycin,<br>piperacillin-<br>tazobactam                                                                                                                                                                         |     |     |
| P22 |     |                           | none                                                                                                                                                                                                               |     |     |
| P23 |     |                           | ceftriaxone,<br>azithromycin                                                                                                                                                                                       |     | Yes |
| P24 |     |                           | ceftazidime,<br>aztreonam,<br>clindamycin,<br>imipenem-<br>cilastin,<br>vancomycin                                                                                                                                 | Yes | Yes |
| P25 |     |                           | azithromycin,<br>ceftriaxone,<br>ampicillin-<br>sulbactam,<br>doxycycline                                                                                                                                          | Yes | Yes |
| P26 |     |                           | ceftriaxone,<br>azithromycin,<br>cefepime,<br>piperacillin-<br>tazobactam,<br>vancomycin,<br>linezolid                                                                                                             |     |     |
| P27 |     |                           | vancomycin,<br>piperacillin-<br>tazobactam                                                                                                                                                                         | Yes | Yes |
| P28 |     |                           | none                                                                                                                                                                                                               |     |     |
| P29 |     |                           | piperacillin-<br>tazobactam,<br>sulfamethoxazole<br>-trimethoprim,<br>amikacin,<br>amphotericin B,<br>ceftriaxone,<br>fluconazole,<br>micafungin,<br>tobramycin,<br>valgancyclovir,<br>vancomycin,<br>voriconazole |     |     |
| P30 |     |                           | micafungin,<br>piperacillin-<br>tazobactam,<br>vancomycin                                                                                                                                                          | Yes | Yes |
| P31 |     |                           | azithromycin,<br>ceftriaxone,<br>linezolid,<br>piperacillin-<br>tazobactam                                                                                                                                         | Yes | Yes |
| P32 |     |                           | none                                                                                                                                                                                                               |     |     |

|     |     |               |                                                                                                                                                                                                                                         |     |     |     |
|-----|-----|---------------|-----------------------------------------------------------------------------------------------------------------------------------------------------------------------------------------------------------------------------------------|-----|-----|-----|
| P33 |     |               | none                                                                                                                                                                                                                                    | Yes | Yes |     |
| P34 |     |               | vancomycin,<br>piperacillin-<br>tazobactam,<br>clindamycin                                                                                                                                                                              |     |     |     |
| P35 | Yes | P. aeruginosa | vancomycin,<br>piperacillin-<br>tazobactam,<br>ceftriaxone                                                                                                                                                                              |     |     |     |
| P36 |     |               | piperacillin-<br>tazobactam                                                                                                                                                                                                             | Yes | Yes |     |
| P37 |     |               | piperacillin-<br>tazobactam,<br>vancomycin,<br>meropenem,<br>ampicillin-<br>sulbactam                                                                                                                                                   | Yes | Yes |     |
| P38 |     |               | azithromycin,<br>cefazolin,<br>meropenem                                                                                                                                                                                                | Yes | Yes |     |
| P39 |     |               | amikacin,<br>cefepime,<br>linezolid,<br>micafungin,<br>piperacillin-<br>tazobactam,<br>voriconazole                                                                                                                                     | Yes | Yes | Yes |
| P40 | Yes | K. pneumoniae | piperacillin-<br>tazobactam,<br>ampicillin-<br>sulbactam,<br>vancomycin,                                                                                                                                                                | Yes |     |     |
| P41 | Yes | MSSA          | ampicillin<br>sulbactam,<br>ceftriaxone,<br>doxycycline,                                                                                                                                                                                |     |     |     |
| P42 | Yes | P. aeruginosa | vancomycin,<br>cefepime,<br>metronidazole,<br>fluconazole,<br>trimethoprim-<br>sulfamethoxazole<br>, ceftriaxone,<br>meropenem,<br>piperacillin-<br>tazobactam,<br>daptomycin,<br>micafungin,<br>amikacin,<br>ceftazidime-<br>avibactam |     |     |     |
| P43 |     |               | ceftriaxone,<br>azithromycin                                                                                                                                                                                                            | Yes | Yes |     |
| P44 | Yes | MSSA          | ceftriaxone,<br>azithromycin,<br>ampicillin,<br>cefazolin,<br>cefepime,<br>fluconazole,<br>gentamicin,<br>linezolid,<br>meropenem,<br>micafungin,<br>piperacillin-<br>tazobactam,<br>vancomycin                                         | Yes | Yes | Yes |

|       |     |                                       |  |                                                            |     |     |
|-------|-----|---------------------------------------|--|------------------------------------------------------------|-----|-----|
| AU-10 |     |                                       |  | none                                                       |     |     |
| AU-13 |     |                                       |  | cefepime,<br>piperacillin-<br>tazobactam,<br>ampicillin    | Yes | Yes |
| AU-17 |     |                                       |  | azithromycin,<br>vancomycin,<br>cefepime,<br>metronidazole | Yes | Yes |
| AU-18 |     |                                       |  | vancomycin,<br>ceftazidime                                 |     |     |
| AU-19 |     |                                       |  | ceftriaxone,<br>doxycycline                                | Yes |     |
| AU-20 |     |                                       |  | vancomycin                                                 | Yes | Yes |
| AU-21 | Yes | MRSA                                  |  | vancomycin,<br>vancomycin,<br>meropenem,<br>doxycycline    | Yes |     |
| AU-22 |     |                                       |  | vancomycin,<br>cefepime                                    | Yes |     |
| AU-29 |     |                                       |  | vancomycin,<br>ceftriaxone                                 | Yes | Yes |
| AU-30 | Yes | E. cloacae, K.<br>pneumoniae,<br>MSSA |  | vancomycin,<br>meropenem,<br>doxycycline,<br>voriconazole  |     |     |
| AU-31 |     |                                       |  | ceftriaxone,<br>vancomycin                                 |     |     |



**Supplementary Table 3: Comparison of cases with pulmonary co-infection with and without fungal co-infection.** P values are univariate analyses between groups.

|                                          | Fungal Pulmonary Co-infection (n=5) | Bacterial Only Co-infection (n=31) | p-value |
|------------------------------------------|-------------------------------------|------------------------------------|---------|
| <b>Median age in years (IQR)</b>         | 41 (27,61)                          | 63 (58,70.5)                       | 0.0480  |
| <b>Female (%)</b>                        | 0/5 (0.0%)                          | 12/31 (38.7%)                      | 0.1464  |
| <b>Race (%)</b>                          |                                     |                                    | 0.5114  |
| <b>White (%)</b>                         | 3/5 (60.0%)                         | 14/31 (45.2%)                      |         |
| <b>Black or African American (%)</b>     | 1/5 (20.0%)                         | 11/31 (35.5%)                      |         |
| <b>Hispanic Ethnicity (%)</b>            | 2/5 (40.0%)                         | 6/31 (19.4%)                       | 0.3048  |
| <b>Median BMI (IQR)</b>                  | 39.2 (32.0,51.0)                    | 31.7 (26.3,38.5)                   | 0.2616  |
| <b>Major Comorbidities (IQR)</b>         | 1 (1,1)                             | 2 (2,4)                            | 0.0273  |
| <b>Immunosuppression/Cancer (%)</b>      | 0/5 (0.0%)                          | 5/31 (16.1%)                       | 0.9999  |
| <b>Pulmonary (%)</b>                     | 0/5 (0.0%)                          | 12/31 (38.7%)                      | 0.1464  |
| <b>Cardiac (%)</b>                       | 1/5 (20.0%)                         | 21/31 (67.7%)                      | 0.0637  |
| <b>Liver (%)</b>                         | 0/5 (0.0%)                          | 2/31 (6.5%)                        | 0.9999  |
| <b>Neuro (%)</b>                         | 0/5 (0.0%)                          | 3/31 (9.7%)                        | 0.9999  |
| <b>Diabetes Mellitus (%)</b>             | 1/5 (20.0%)                         | 15/31 (48.4%)                      | 0.3549  |
| <b>CKD (%)</b>                           | 0/5 (0.0%)                          | 5/31 (16.1%)                       | 0.9999  |
| <b>Obesity (%)</b>                       | 4/5 (80.0%)                         | 18/31 (58.1%)                      | 0.6283  |
| <b>Days from onset to death (IQR)</b>    | 31 (27,42)                          | 18 (10.5,26.5)                     | 0.0453  |
| <b>Hospital duration, days (IQR)</b>     | 27 (22,33)                          | 10 (5.5,16.5)                      | 0.0016  |
| <b>ICU duration, days (IQR)</b>          | 22 (22,29)                          | 7 (4,14.5)                         | 0.0207  |
| <b>Intubation duration, days (IQR)</b>   | 22 (21.0,29.0)                      | 6 (1.0,13.5)                       | 0.1076  |
| <b>Post-Mortem Interval, hours (IQR)</b> | 19.8 (19.2,33.7)                    | 24.6 (19.5,36.5)                   | 0.5296  |
| <b>ICU Admission, (%)</b>                | 5/5 (100.0%)                        | 29/31 (93.5%)                      | 0.9999  |
| <b>Intubated, (%)</b>                    | 5/5 (100.0%)                        | 27/31 (87.1%)                      | 0.9999  |
| <b>Pressor Use (%)</b>                   | 5/5 (100.0%)                        | 23/31 (74.2%)                      | 0.5655  |

|                                          |                  |                  |        |
|------------------------------------------|------------------|------------------|--------|
| <b>RRT (%)</b>                           | 3/5 (60.0%)      | 12/31 (38.7%)    | 0.6296 |
| <b>ECMO (%)</b>                          | 2/5 (40.0%)      | 5/31 (16.1%)     | 0.2440 |
| <b>Abnormal Chest Imaging (%)</b>        | 5/5 (100%)       | 30/31 (96.8%)    | 0.9999 |
| <b>Antibiotic Use, (%)</b>               | 5/5 (100.0%)     | 29/31 (93.5%)    | 0.9999 |
| <b>HAP Coverage, (%)</b>                 | 4/5 (80.0%)      | 20/31 (64.5%)    | 0.6457 |
| <b>COVID-Specific Therapies</b>          |                  |                  |        |
| <b>Steroid Use, (%)</b>                  | 5/5 (100.0%)     | 27/31 (87.1%)    | 0.9999 |
| <b>Remdesivir, (%)</b>                   | 4/5 (80.0%)      | 14/31 (45.2%)    | 0.3377 |
| <b>Tocilizumab, (%)</b>                  | 2/5 (40.0%)      | 2/31 (6.5%)      | 0.1548 |
| <b>Convalescent Plasma, (%)</b>          | 2/5 (40.0%)      | 6/31 (19.4%)     | 0.3048 |
| <b>Days from onset to death (IQR)</b>    | 31 (27,42)       | 18 (10.5,26.5)   | 0.0453 |
| <b>Hospital duration, days (IQR)</b>     | 27 (22,33)       | 10 (5.5,16.5)    | 0.0016 |
| <b>ICU duration, days (IQR)</b>          | 22 (22,29)       | 7 (4,14.5)       | 0.0207 |
| <b>Intubation duration, days (IQR)</b>   | 22 (21.0,29.0)   | 6 (1.0,13.5)     | 0.1076 |
| <b>Post-Mortem Interval, hours (IQR)</b> | 19.8 (19.2,33.7) | 24.6 (19.5,36.5) | 0.5296 |
| <b>ICU Admission, (%)</b>                | 5/5 (100.0%)     | 29/31 (93.5%)    | 0.9999 |
| <b>Intubated, (%)</b>                    | 5/5 (100.0%)     | 27/31 (87.1%)    | 0.9999 |
| <b>Any Pre-mortem Infection</b>          | 4/5 (80.0%)      | 12/31 (38.7%)    | 0.1493 |
| <b>Pulmonary</b>                         | 2/5 (40.0%)      | 9/31 (29.0%)     | 0.6309 |
| <b>Extra Pulmonary</b>                   | 4/5 (80.0%)      | 11/31 (35.5%)    | 0.138  |
| <b>Bacteremia</b>                        | 3/5 (60.0%)      | 8/31 (25.8%)     | 0.1544 |
| <b>UTI</b>                               | 0/5 (0.0%)       | 2/31 (6.5%)      | 0.9999 |
| <b>Fungemia</b>                          | 2/5 (40.0%)      | 2/31 (6.5%)      | 0.0843 |

|                                    |             |             |        |
|------------------------------------|-------------|-------------|--------|
| <b>Skin/Soft Tissue Infection</b>  | 1/5 (20.0%) | 0/31 (0.0%) | 0.1389 |
| <b><i>C. difficile</i> colitis</b> | 0/5 (0.0%)  | 1/31 (3.2%) | 0.9999 |
